# Supplementary material for: Oh So Sweet: A Comparative Investigation of Retail Market Composition of Sweetened and Flavoured Beverages in Singapore and Australia
Source: MDPI journal article supplement (doi:10.3390/nu15010247), 2023-01-03
Supplement: s1 [file s1]

## Supplementary Material

Supplementary Figure S1: Overview of the number of Australian sweetened and flavoured beverages included at each stage of the project (data collection, cleaning and analysis)

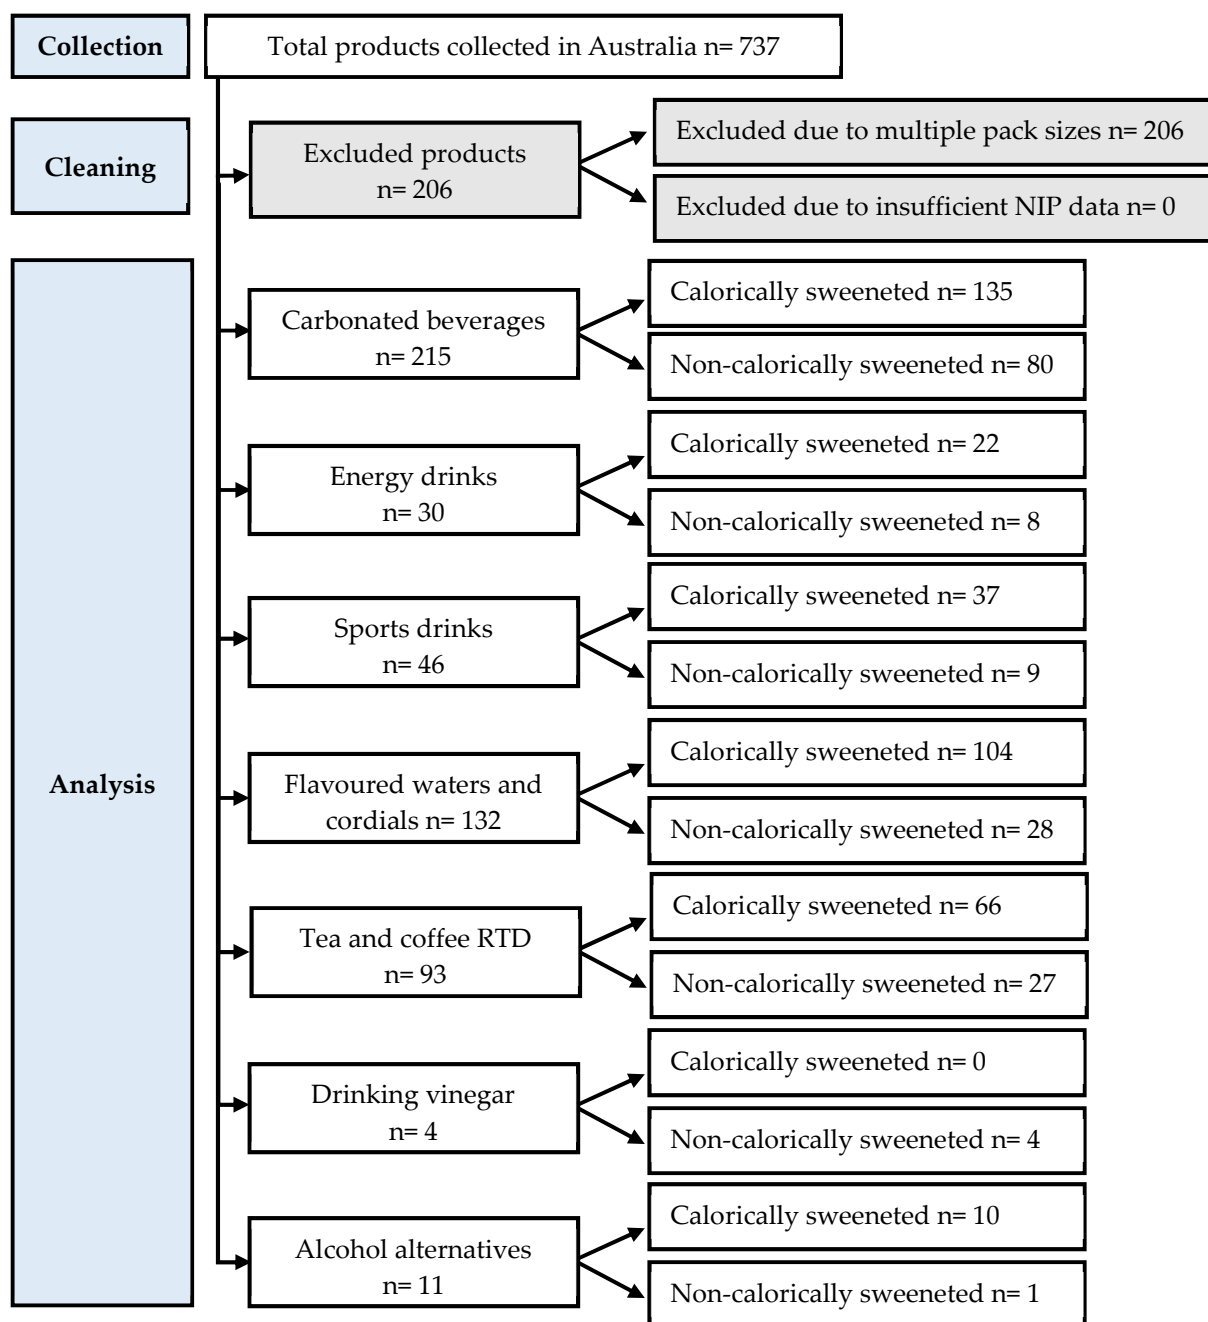

Supplementary Figure S2: Overview of the number of Singaporean sweetened and flavoured beverages included at each stage of the project (data collection, cleaning and analysis)

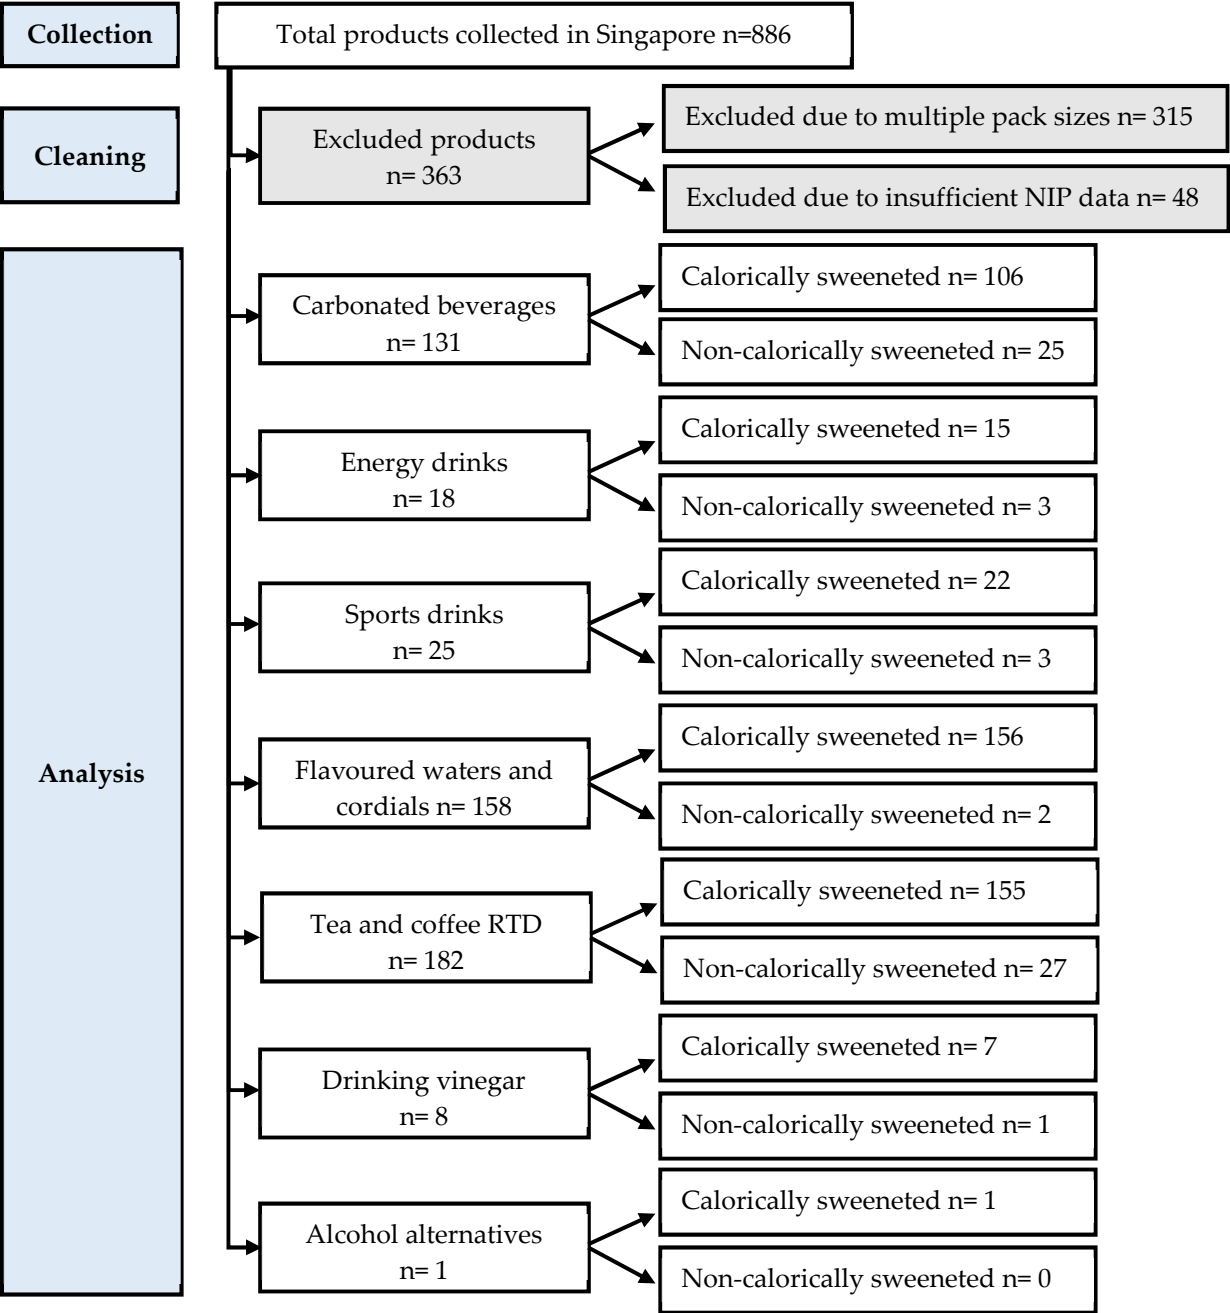

Supplementary Table S1: Products excluded due to data only being available for dry/undiluted versions of products (i.e. insufficient NIP data) or because they were available in multiple pack sizes and therefore duplicated.

|                                      | Australia            |                      | Singapore            |                      | Total products excluded, n |
|--------------------------------------|----------------------|----------------------|----------------------|----------------------|----------------------------|
|                                      | Dry/<br>undiluted, n | Size<br>duplicate, n | Dry/<br>Undiluted, n | Size<br>duplicate, n |                            |
| <b>Carbonated beverages</b>          | -                    | 121                  | -                    | 90                   | 211                        |
| <i>Calorically sweetened</i>         | -                    | 71                   | -                    | 70                   | 141                        |
| <i>Not calorically sweetened</i>     | -                    | 50                   | -                    | 20                   | 70                         |
| <b>Energy drinks</b>                 | -                    | 23                   | -                    | 9                    | 32                         |
| <i>Calorically sweetened</i>         | -                    | 17                   | -                    | 7                    | 24                         |
| <i>Not calorically sweetened</i>     | -                    | 6                    | -                    | 2                    | 8                          |
| <b>Sports drinks</b>                 | -                    | 8                    | 3                    | 31                   | 42                         |
| <i>Calorically sweetened</i>         | -                    | 8                    | 3                    | 25                   | 36                         |
| <i>Not calorically sweetened</i>     | -                    | -                    | -                    | 6                    | 6                          |
| <b>Flavoured waters and cordials</b> | -                    | 12                   | 6                    | 60                   | 78                         |
| <i>Calorically sweetened</i>         | -                    | 12                   | 6                    | 60                   | 78                         |
| <i>Not calorically sweetened</i>     | -                    | -                    | -                    | -                    | -                          |
| <b>Tea and Coffee RTD</b>            | -                    | 38                   | 9                    | 122                  | 169                        |
| <i>Calorically sweetened</i>         | -                    | 19                   | 9                    | 93                   | 121                        |

|                                      |   |    |    |    |    |
|--------------------------------------|---|----|----|----|----|
| <i>Not calorically<br/>sweetened</i> | - | 19 | -  | 29 | 48 |
| <b>Drinking vinegar</b>              | - | 4  | 30 | 3  | 37 |
| <i>Calorically sweetened</i>         | - | -  | 28 | 3  | 31 |
| <i>Not calorically<br/>sweetened</i> | - | 4  | 2  | -  | 6  |
| <b>Alcohol alternatives</b>          | - | -  | -  | -  | -  |

---

Supplementary Table S2: nutrient information broken down into categories and sub-categories.

|                           | Energy (kJ per 100mL) |        |      |           |        |       | Sugar (g per 100mL) |        |     |           |        |     |
|---------------------------|-----------------------|--------|------|-----------|--------|-------|---------------------|--------|-----|-----------|--------|-----|
|                           | Australia             |        |      | Singapore |        |       | Australia           |        |     | Singapore |        |     |
|                           | Count                 | Median | IQR  | Count     | Median | IQR   | Count               | Median | IQR | Count     | Median | IQR |
| Carbonated beverages      |                       |        |      |           |        |       |                     |        |     |           |        |     |
| Calorically sweetened     | 135                   | 170    | 98.0 | 102       | 152    | 90.4  | 135.0               | 9.8    | 6.0 | 99.0      | 8.6    | 5.4 |
| Not calorically sweetened | 80                    | 3      | 5.1  | 22        | 0      | 3.0   | 80.0                | 0.0    | 0.0 | 24.0      | 0.0    | 0.0 |
| Energy drinks             |                       |        |      |           |        |       |                     |        |     |           |        |     |
| Calorically sweetened     | 22                    | 195    | 22.0 | 15        | 193    | 140.1 | 22.0                | 11.0   | 2.1 | 13.0      | 8.6    | 7.1 |
| Not calorically sweetened | 8                     | 13     | 1.6  | 3         | 12     | 107.7 | 8.0                 | 0.0    | 0.0 | 3.0       | 0.0    | 0.0 |
| Sports drinks             |                       |        |      |           |        |       |                     |        |     |           |        |     |
| Calorically sweetened     | 37                    | 104    | 22.0 | 22        | 101    | 13.0  | 37.0                | 6.0    | 0.2 | 22.0      | 5.7    | 0.6 |
| Not calorically sweetened | 9                     | 5      | 1.1  | 3         | 29     | 29.5  | 9.0                 | 0.0    | 0.0 | 3.0       | 0.0    | 0.0 |

**Flavoured waters and cordials**

|                                  |     |     |      |     |     |      |       |     |     |       |     |     |
|----------------------------------|-----|-----|------|-----|-----|------|-------|-----|-----|-------|-----|-----|
| <i>Calorically sweetened</i>     | 104 | 111 | 57.0 | 136 | 143 | 76.4 | 104.0 | 5.7 | 3.3 | 131.0 | 7.5 | 4.3 |
| <i>Not calorically sweetened</i> | 28  | 10  | 6.5  | 2   | 10  | 5.0  | 28.0  | 0.3 | 0.5 | 2.0   | 0.2 | 0.1 |

**Tea and Coffee RTD**

|                                  |    |    |      |     |     |      |      |     |     |       |     |     |
|----------------------------------|----|----|------|-----|-----|------|------|-----|-----|-------|-----|-----|
| <i>Calorically sweetened</i>     | 66 | 63 | 46.0 | 147 | 105 | 78.0 | 66.0 | 2.1 | 3.4 | 137.0 | 5.8 | 3.3 |
| <i>Not calorically sweetened</i> | 27 | 29 | 34.0 | 25  | 0   | 4.0  | 27.0 | 0.0 | 0.0 | 27.0  | 0.0 | 0.0 |

**Drinking vinegar**

|                                  |   |    |      |   |     |       |     |     |     |     |     |     |
|----------------------------------|---|----|------|---|-----|-------|-----|-----|-----|-----|-----|-----|
| <i>Calorically sweetened</i>     |   |    | 0.0  | 7 | 115 | 118.4 |     |     | 0.0 | 7.0 | 5.9 | 6.7 |
| <i>Not calorically sweetened</i> | 4 | 45 | 22.5 | 1 | 0   | 0.0   | 4.0 | 0.0 | 0.0 |     |     | 0.0 |

**Alcohol alternatives**

|                                  |    |     |      |   |     |     |      |     |     |     |      |     |
|----------------------------------|----|-----|------|---|-----|-----|------|-----|-----|-----|------|-----|
| <i>Calorically sweetened</i>     | 10 | 107 | 97.0 | 1 | 184 | 0.0 | 10.0 | 3.9 | 6.6 | 1.0 | 10.8 | 0.0 |
| <i>Not calorically sweetened</i> | 1  | 91  | 0.0  |   |     | 0.0 | 1.0  | 1.0 | 0.0 |     |      | 0.0 |

**Total**

|                              |     |     |      |     |     |      |       |     |     |       |     |     |
|------------------------------|-----|-----|------|-----|-----|------|-------|-----|-----|-------|-----|-----|
| <i>Calorically sweetened</i> | 374 | 120 | 98.0 | 430 | 134 | 79.6 | 374.0 | 6.4 | 6.1 | 410.0 | 6.8 | 4.2 |
|------------------------------|-----|-----|------|-----|-----|------|-------|-----|-----|-------|-----|-----|

|                                  |     |   |      |    |   |     |       |     |     |      |     |     |
|----------------------------------|-----|---|------|----|---|-----|-------|-----|-----|------|-----|-----|
| <i>Not calorically sweetened</i> | 157 | 7 | 10.4 | 56 | 0 | 6.0 | 157.0 | 0.0 | 0.0 | 59.0 | 0.0 | 0.0 |
|----------------------------------|-----|---|------|----|---|-----|-------|-----|-----|------|-----|-----|

---

Supplementary Table S3: Sugar per serve and serve sizes for calorically sweetened beverages included in Australia and Singapore

|                                      | Australia           |       |                 |     | Singapore           |       |                 |     |
|--------------------------------------|---------------------|-------|-----------------|-----|---------------------|-------|-----------------|-----|
|                                      | Sugar per serve (g) |       | Serve Size (mL) |     | Sugar per serve (g) |       | Serve Size (mL) |     |
|                                      | Median              | IQR   | Median          | IQR | Median              | IQR   | Median          | IQR |
| <b>Carbonated beverages</b>          | 25.75               | 16.5  | 250             | 80  | 25.74               | 14.32 | 250             | 75  |
| <b>Energy drinks</b>                 | 32.75               | 25.5  | 290             | 250 | 25                  | 19.52 | 250             | 10  |
| <b>Sports drinks</b>                 | 15.25               | 20.3  | 325             | 350 | 13.5                | 2.6   | 250             | 50  |
| <b>Flavoured waters and cordials</b> | 14.8                | 6.52  | 250             | 0   | 18.24               | 10.4  | 250             | 60  |
| <b>Tea and Coffee</b>                | 6.27                | 8.54  | 250             | 80  | 15                  | 9.1   | 250             | 50  |
| <b>Total</b>                         | 17.5                | 15.62 | 250             | 80  | 17.25               | 12    | 250             | 60  |
